# Supplementary material for: Seeking large Seebeck effects in LaX(X = Mn and Co)O3/SrTiO3 superlattices by exploiting high spin-polarized effects
Source: Royal Society of Chemistry journal article supplement (doi:10.1039/c9cp02486g), 2019-01-01
Supplement: c9cp02486g1.pdf [file c9cp02486g1.pdf]

## Supplementary Materials for

### Seeking large spin-Seebeck effects in $\text{LaX}(\text{X}=\text{Mn and Co})\text{O}_3/\text{SrTiO}_3$ superlattice by exploiting high spin-polarized effect

Jingyu Li<sup>a</sup>, Yuanxu Wang<sup>\*a</sup>, Guangbiao Zhang<sup>a</sup>, Huabing Yin<sup>a</sup>, Dong Chen<sup>a</sup>, Wei Sun<sup>a</sup>, Beibei Shi,  
Zhenxiang Cheng<sup>\*ab</sup>

<sup>a</sup> *Institute for Computational Materials Science, School of Physics and Electronics, Henan University, Kaifeng 475004, People's Republic of China*      E-mail: [wangyx@henu.edu.cn](mailto:wangyx@henu.edu.cn) (Y. Wang)

<sup>b</sup> *Institute for Superconducting and Electronic Materials, University of Wollongong, Squires Way, North Wollongong, Australia*      E-mail: [cheng@uow.edu.au](mailto:cheng@uow.edu.au) (Z. Cheng)

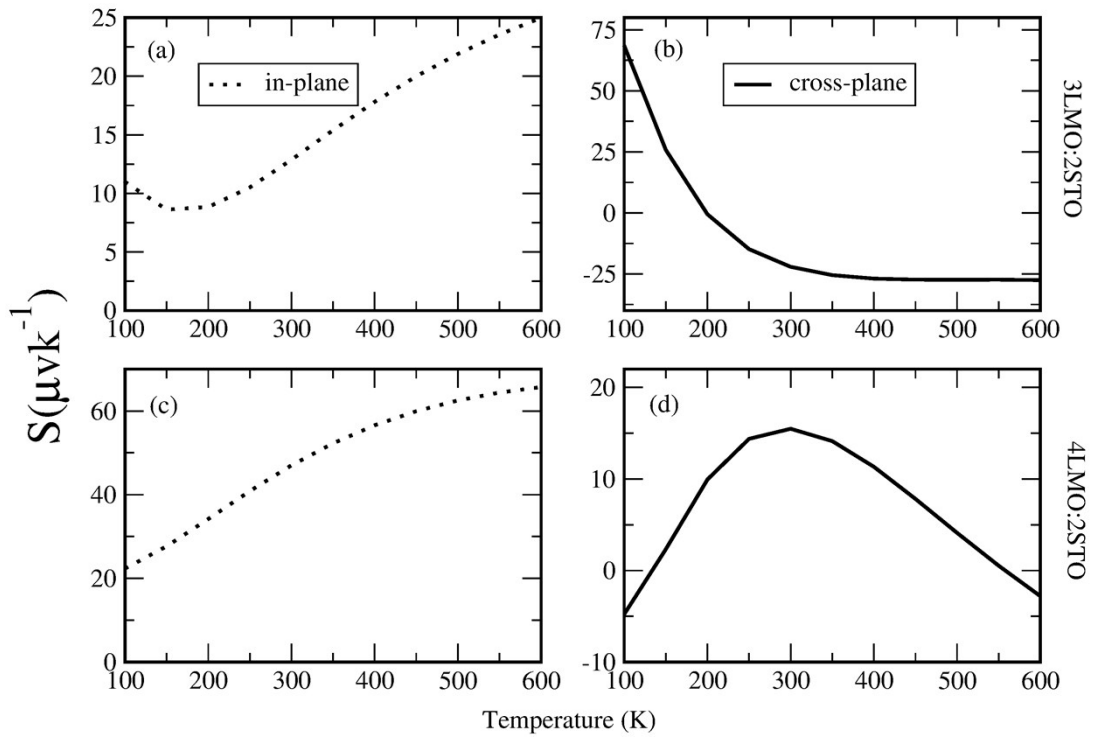

FIG. S1: Spin-Seebeck coefficients for thickness ratio of LMO/STO with (a) and (b) 3:2, (c) and (d) 4:2. The dotted and solid black line represents the in-plane and cross-plane directions, respectively.

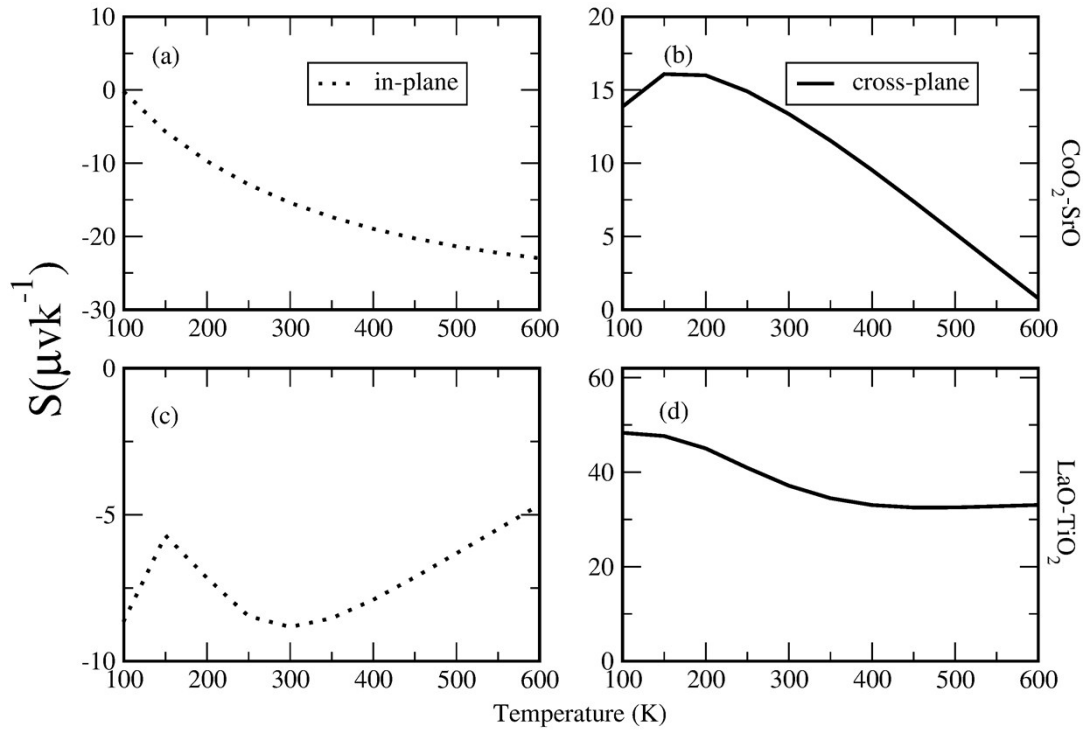

FIG. S2: Spin-Seebeck coefficients for different types of interfaces of LCO/STO with (a) and (b) pure  $\text{CoO}_2\text{-STO}$ , (c) and (d) pure  $\text{LaO-TiO}_2$  terminations. The dotted and solid black line represents the in-plane and cross-plane directions, respectively.
